# Supplementary material
Source: ML conference proceedings conference paper supplement (https://openaccess.thecvf.com/content/ICCV2021/html/Schon_MGNet_Monocular_Geometric_ICCV_2021_paper.html)
Supplement: Supplementary file 2 [file Schon_MGNet_Monocular_Geometric_ICCV_2021_supplemental.zip]

Archive with 3 entries (3 files):
- 08933-supp.pdf
- demo_video_cityscapes.mp4
- demo_video_kitti.mp4
